# Supplementary material
Source: Preprints.org preprint supplement (doi:10.20944/preprints202003.0252.v1)
Supplement: Supplementary file 1 [file supplementary]

**Table S1. Search strategy**

| <b>ID</b>               | <b>ID Search Terms</b>                                                                                                             | <b>Results</b> |
|-------------------------|------------------------------------------------------------------------------------------------------------------------------------|----------------|
| <b>Medline (Pubmed)</b> |                                                                                                                                    |                |
| <b>#1</b>               | (((((COVID-19) OR Coronavirus) OR severe acute respiratory syndrome coronavirus) OR Wuhan Coronavirus) OR SARS-CoV-2) OR 2019-nCoV | <b>15678</b>   |
| <b>#2</b>               | ((((COVID-19) OR SARS-CoV-2) OR 2019-nCoV) OR Wuhan Coronavirus                                                                    | <b>323</b>     |
| <b>#3</b>               | (Coronavirus) OR severe acute respiratory syndrome coronavirus                                                                     | <b>15591</b>   |
| <b>#4</b>               | #2 AND #3                                                                                                                          | <b>236</b>     |
| <b>Cochrane library</b> |                                                                                                                                    |                |
| <b>#1</b>               | (COVID-19) OR Coronavirus) OR severe acute respiratory syndrome coronavirus) OR Wuhan Coronavirus) OR SARS-CoV-2) OR 2019-nCoV     | <b>1</b>       |
| <b>#2</b>               | (Coronavirus) OR severe acute respiratory syndrome coronavirus                                                                     | <b>1</b>       |
| <b>Web of Science</b>   |                                                                                                                                    |                |
| <b>#1</b>               | COVID-19, COVID-19 AND Respiratory syndrome, Coronavirus -2019, Novel Coronavirus OR/AND Respiratory Syndrome AND 2019-nCov        | <b>1877</b>    |
| <b>#2</b>               | Wuhan Corona virus AND Respiratory syndrome, 2019-nCov                                                                             | <b>87</b>      |
| <b>Scopus</b>           |                                                                                                                                    |                |
| <b>#1</b>               | COVID- 19 OR/AND Respiratory syndrome, Novel Coronavirus -2019 OR/AND Respiratory syndrome                                         | <b>1346</b>    |
| <b>#2</b>               | Novel Coronavirus AND Respiratory syndrome, Wuhan Coronavirus, Coronavirus 2019                                                    | <b>975</b>     |
| <b>Embase</b>           |                                                                                                                                    |                |
| <b>#1</b>               | (((((COVID-19) OR Coronavirus) OR severe acute respiratory syndrome coronavirus) OR Wuhan Coronavirus) OR SARS-CoV-2) OR 2019-nCoV | <b>19482</b>   |

|           |                                                                |              |
|-----------|----------------------------------------------------------------|--------------|
| <b>#2</b> | (((COVID-19) OR SARS-CoV-2) OR 2019-nCoV) OR Wuhan Coronavirus | <b>690</b>   |
| <b>#3</b> | (Coronavirus) OR severe acute respiratory syndrome coronavirus | <b>19422</b> |
| <b>#4</b> | #2 AND #3                                                      | <b>630</b>   |

**Table S2. Quality assessment of included studies.**

| First Author       | Q1  | Q2  | Q3  | Q4  | Q5  | Q6  | Q7  | Q8  | Q9  | Total QA score |
|--------------------|-----|-----|-----|-----|-----|-----|-----|-----|-----|----------------|
| Nanshan Chen       | Yes | 9              |
| Kaiyuan Sun        | yes | yes | yes | no  | no  | yes | yes | yes | yes | 7              |
| Jie Li             | yes | yes | no  | yes | yes | yes | yes | yes | yes | 8              |
| Dawei Wang         | yes | 9              |
| Chaolin Huang      | yes | 9              |
| Weijie Guan        | yes | 9              |
| Yang Yang*         | UN             |
| Lei Chen (Chinese) | yes | yes | no  | yes | yes | no  | no  | yes | yes | 6              |
| Adam Bernheim      | yes | yes | yes | yes | no  | yes | yes | yes | yes | 8              |
| Feng Pan           | yes | yes | no  | yes | yes | yes | yes | yes | yes | 8              |
| jin Zhang          | yes | 9              |
| Yichun Cheng       | yes | 9              |
| Ming-Yen           | yes | yes | no  | yes | yes | yes | yes | yes | yes | 8              |
| Sijia Tian         | yes | yes | yes | no  | no  | yes | yes | yes | yes | 7              |
| Qun Li             | yes | 9              |
| De Chang           | yes | yes | no  | no  | yes | yes | yes | UN  | yes | 6              |
| Xiao-Wei Xu        | yes | 9              |
| Fengxiang Song     | yes | 9              |
| Michael Chung      | yes | yes | no  | yes | yes | yes | yes | yes | yes | 8              |
| Zunyou Wu (CDC)    | yes | Yes | yes | NA  | NA  | yes | yes | NA  | yes | 6              |

\*full text is not available. UN= Un Known, NA= not available

Q1= Was the sample frame appropriate to address the target population?

Q2= Were study participants sampled in an appropriate way?

Q3= Was the sample size adequate?

Q4= Were the study subjects and the setting described in detail?

Q5= Was the data analysis conducted with sufficient coverage of the identified sample?

Q6= Were valid methods used for the identification of the condition?

Q7= Was the condition measured in a standard, reliable way for all participants?

Q8= Was there appropriate statistical analysis?

Q9= Was the response rate adequate, and if not, was the low response rate managed appropriately?
